# Supplementary material for: CMIP6 projections of ocean warming and the impact on dimethylsulfide emissions from the Great Barrier Reef, Australia
Source: Frontiers journal article supplement (doi:10.3389/fmars.2022.910420), 2022-09-29
Supplement: Data_Sheet_1.PDF [file Data_Sheet_1.PDF]

## Supplementary Material

Modelled annual and seasonal mean sea surface temperature (SST; °C), photosynthetically active radiation at 5 m (PAR; mol m<sup>-2</sup> d<sup>-1</sup>), cloud cover (%), diffuse attenuation coefficient ( $k_{490}$ ; m<sup>-1</sup>), wind speed at 10 m (m s<sup>-1</sup>), and dimethylsulfide gas transfer velocity ( $K_w$ ; cm hr<sup>-1</sup>) is shown below for a contemporary (2001-2020) climate, calculated as the average of ACCESS-CM2 and ACCESS-ESM 1.5 model output for the Coupled Model Intercomparison Project Phase 6 (CMIP6). The modelled change in each variable by the end of this century (2081-2100) is shown for a SSP2-4.5 and SSP5-8.5 Shared Socioeconomic Pathway (SSP).

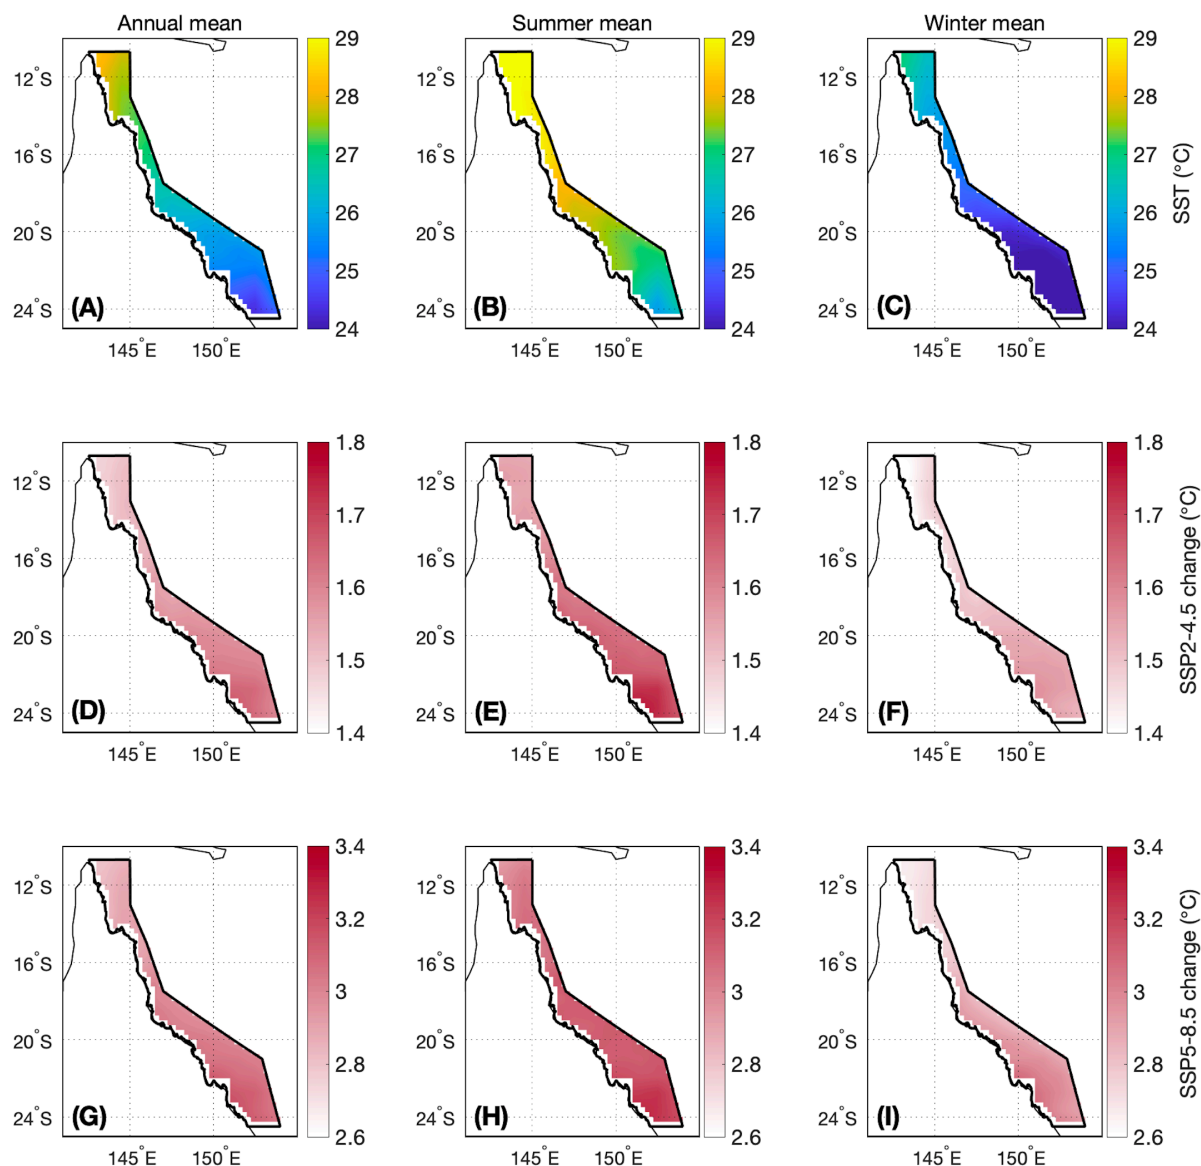

**SI Figure 1.** Contemporary (A) annual, (B) summer (November-April) and (C) winter (May-October) mean SST and the change in (D, G) annual, (E, H) summer and (F, I) winter mean SST by the end of this century modelled under a (middle panels) SSP2-4.5 and (lower panels) SSP5-8.5 scenario. The bold black outline shows the boundary of the Great Barrier Reef Marine Park (GBRMP). Note that the colour scales differ between the SSP-2.5 and SSP5-8.5 changes.

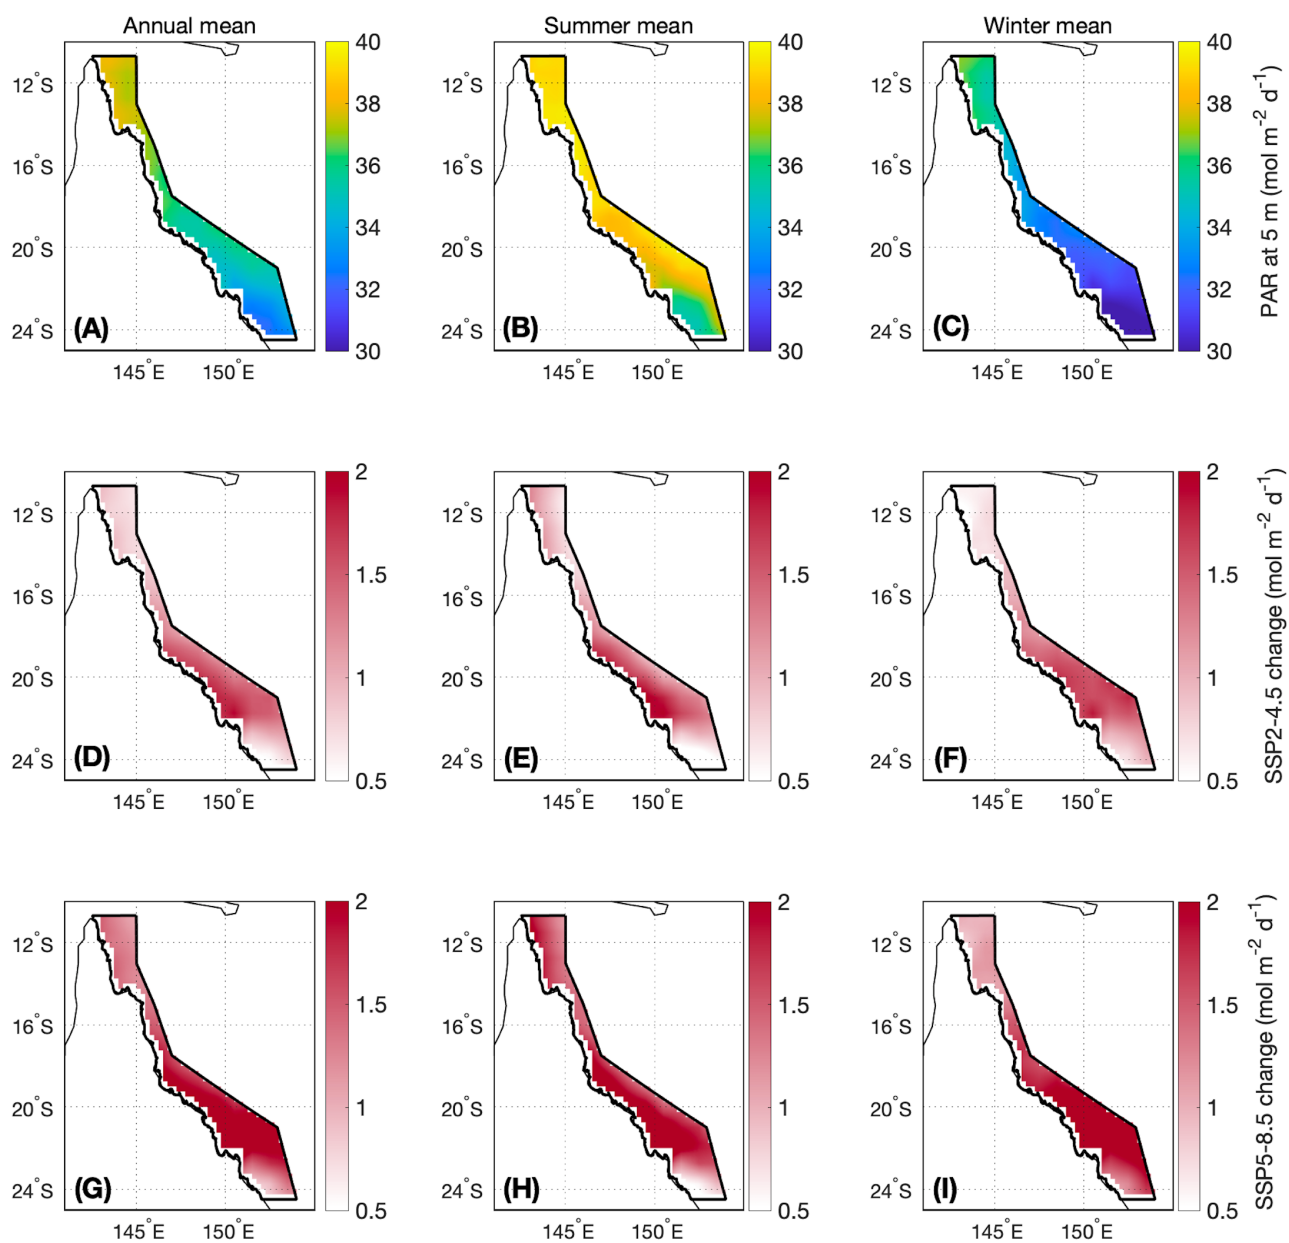

**SI Figure 2.** As for SI Figure 1, but for PAR at 5 m.

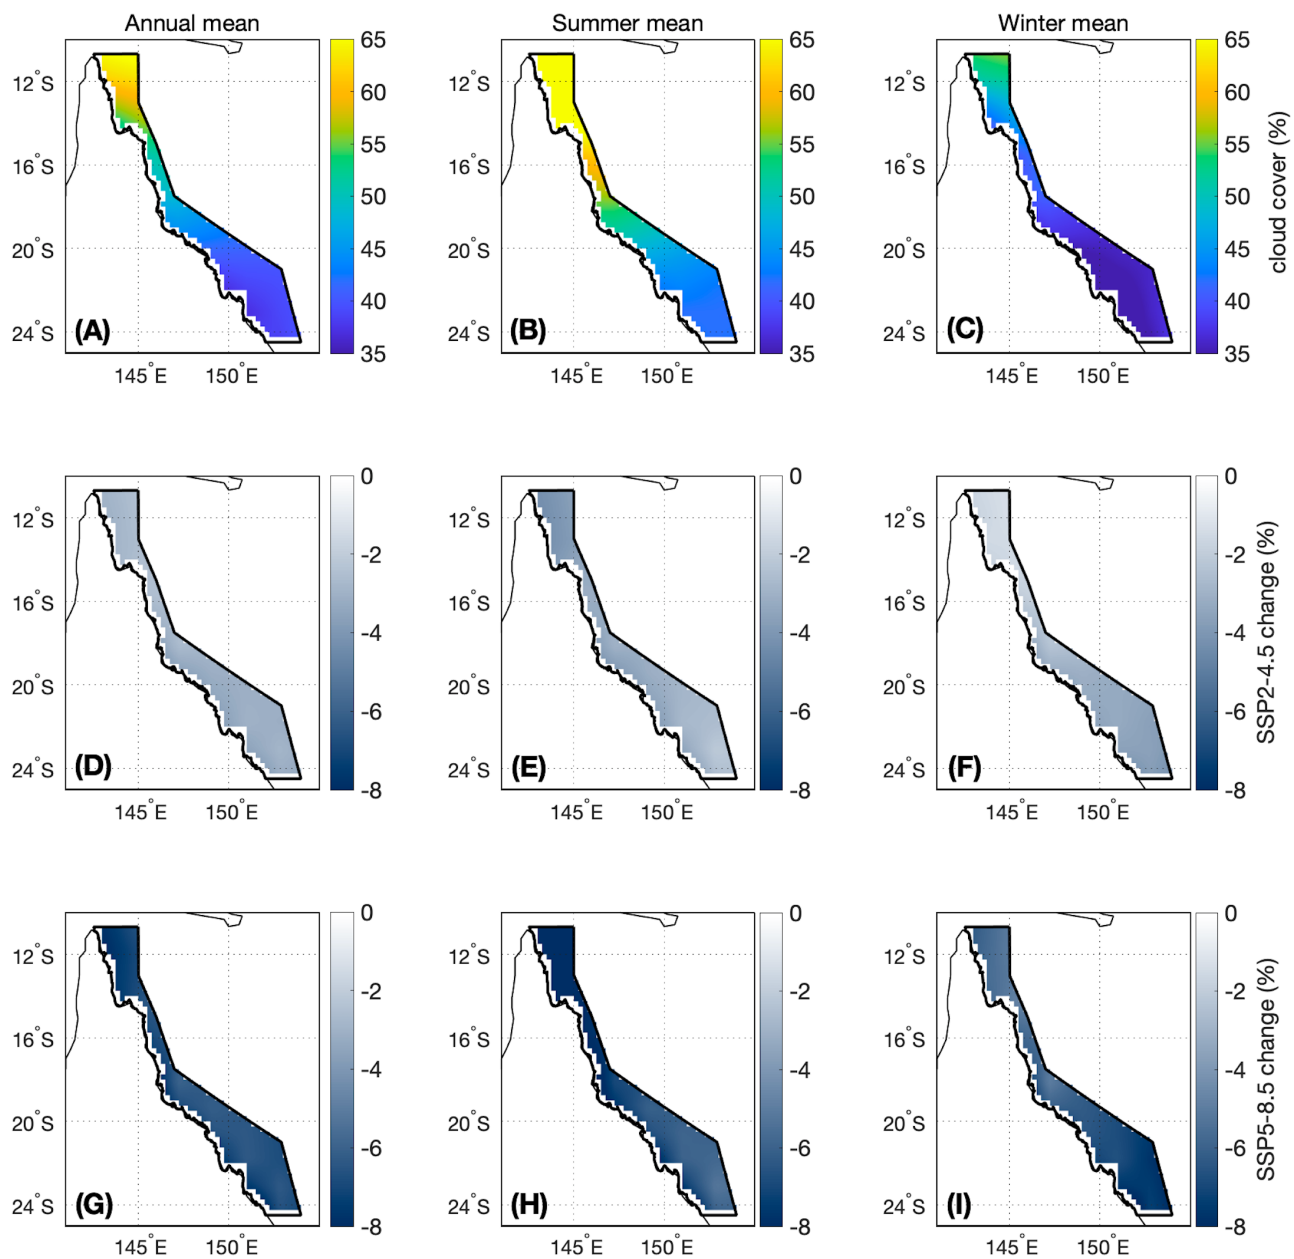

**SI Figure 3.** As for SI Figure 1, but for cloud cover.

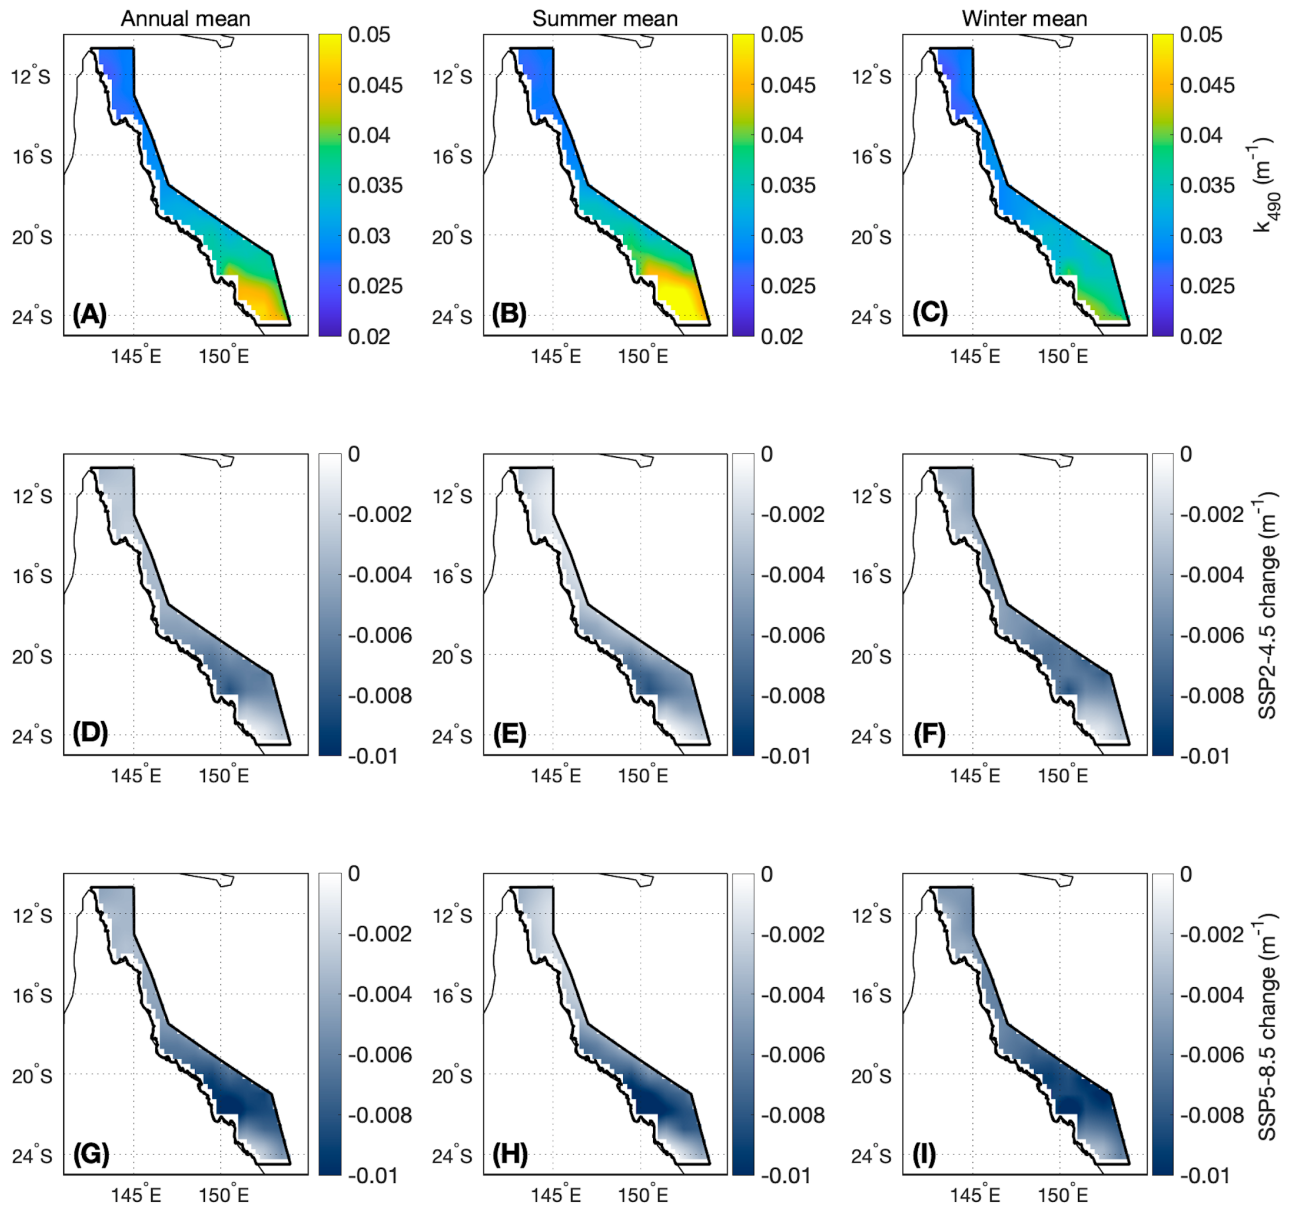

**SI Figure 4.** As for SI Figure 1, but for  $k_{490}$ .

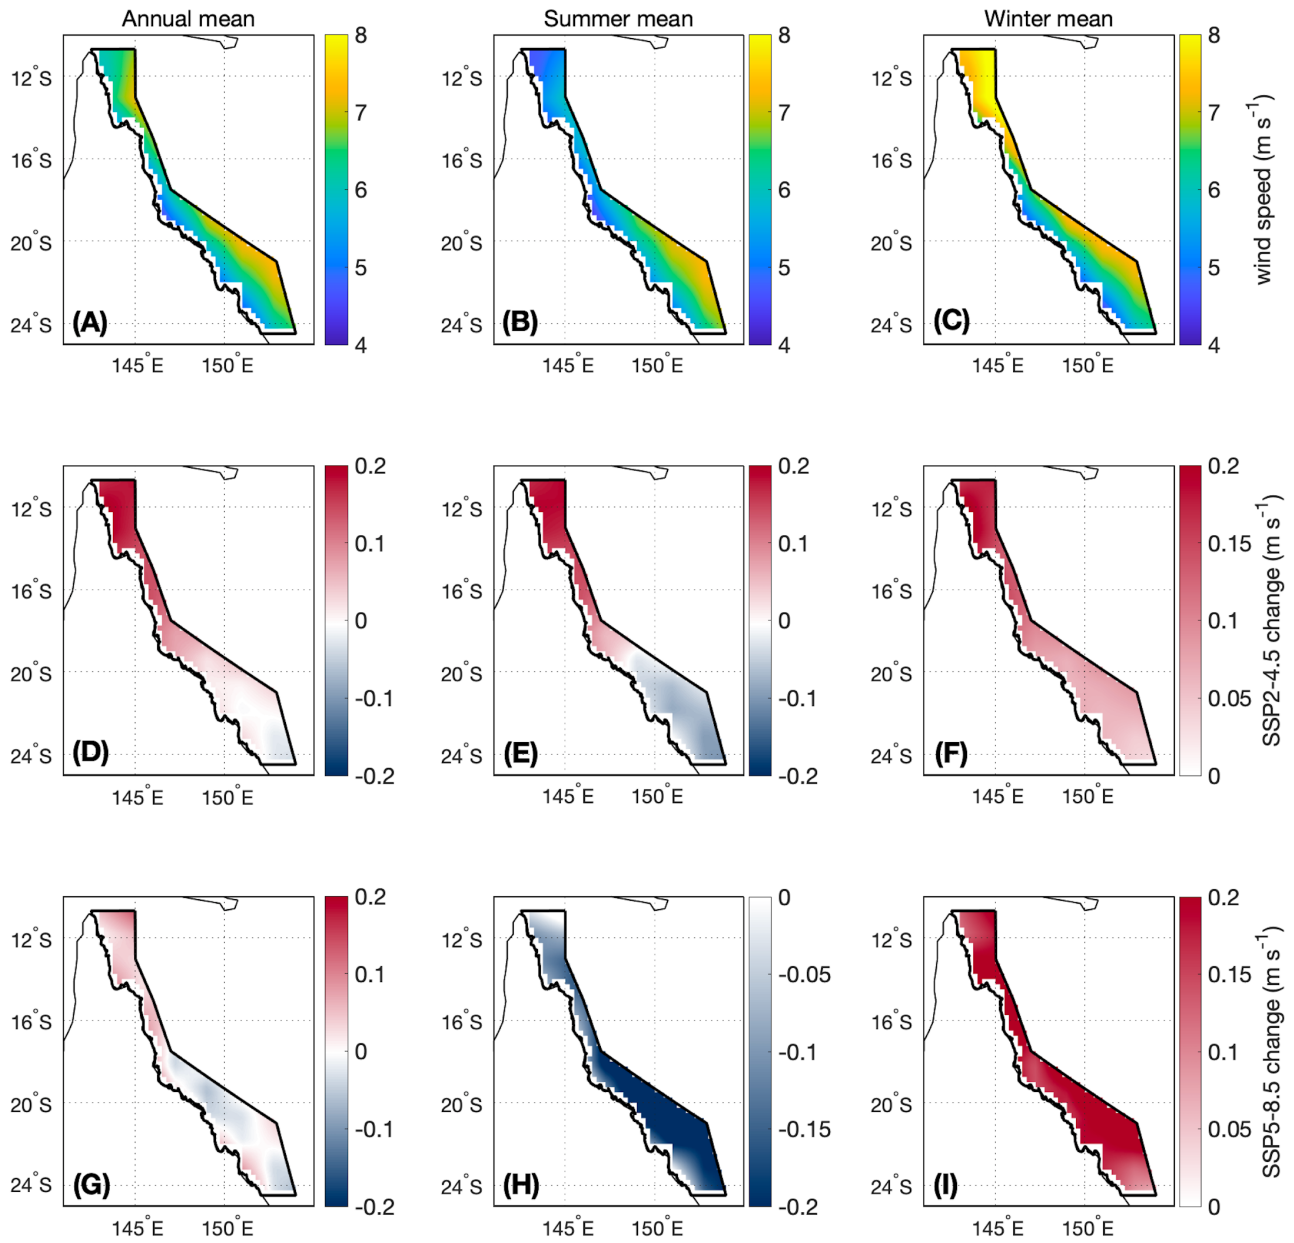

**SI Figure 5.** As for SI Figure 1, but for wind speed at 10 m.

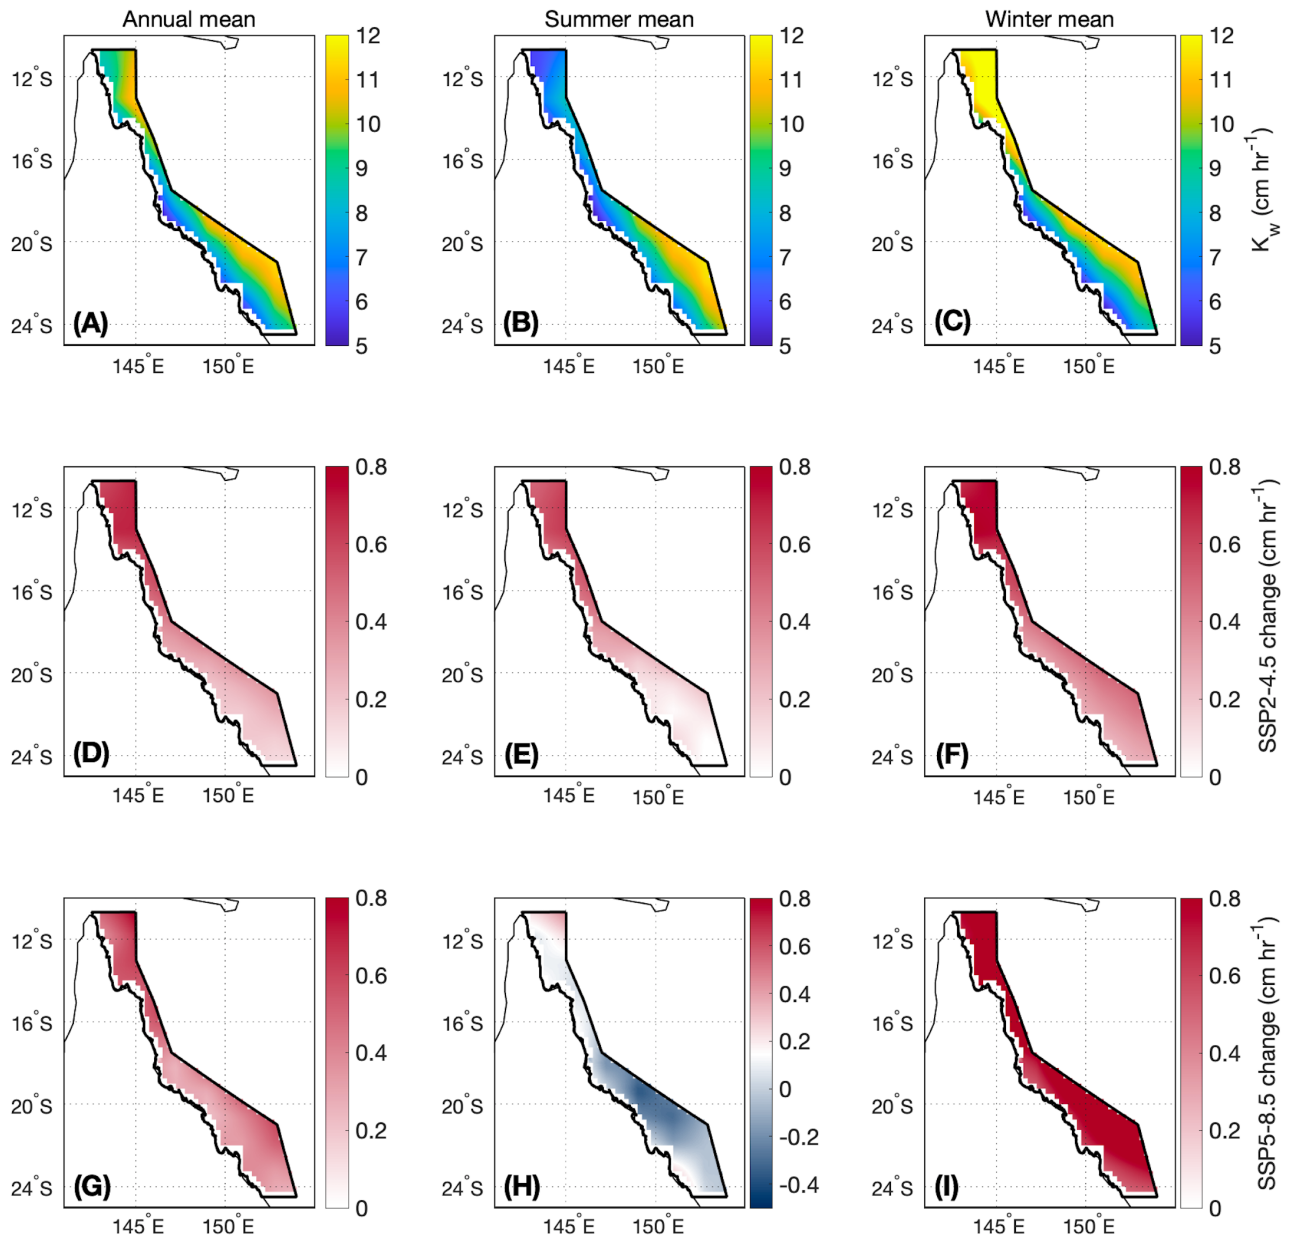

**SI Figure 6.** As for SI Figure 1, but for  $K_w$ .
